# Supplementary material
Source: HighWire-hosted journal article supplement (https://ard.bmj.com/content/82/5/639)
Supplement: inline-supplementary-material-1 [file inline-supplementary-material-1.pdf]

1 **Supplement to:**  
2 **Lupus Low Disease Activity State Attainment in the Phase 3 TULIP Trials of**  
3 **Anifrolumab in Active Systemic Lupus Erythematosus**

4

5 Eric F. Morand<sup>1</sup>, Gabriel Abreu<sup>2</sup>, Richard A. Furie<sup>3</sup>, Vera Golder<sup>1</sup>, Raj Tummala<sup>4</sup>

6

7 <sup>1</sup>Centre for Inflammatory Diseases, Monash University, Melbourne, Victoria, Australia

8 <sup>2</sup>Biometrics, Late Respiratory & Immunology, BioPharmaceuticals R&D, AstraZeneca,

9 Gothenburg, Sweden

10 <sup>3</sup>Zucker School of Medicine at Hofstra/Northwell, Division of Rheumatology, Great Neck,

11 NY, USA

12 <sup>4</sup>Clinical Development, Late Respiratory & Immunology, BioPharmaceuticals R&D,

13 AstraZeneca, Gaithersburg, MD, USA

14 **Running title:** LLDAS Attainment in TULIP Phase 3 Trials of Anifrolumab

15 **Target journal:** *Annals of the Rheumatic Diseases*

16 **Corresponding author:** Raj Tummala

17 1 MedImmune Way

18 Gaithersburg, MD 20878

19 **Phone:** 1-301-398-0548

20 **Email:** [Raj.Tummala@astrazeneca.com](mailto:Raj.Tummala@astrazeneca.com)

21 **ORCID iD:** 0000-0002-5506-4445

22

## 23 SUPPLEMENTARY FIGURES

24 **Figure S1.** Percentage of patients meeting the composite definition of lupus low disease  
 25 activity state responder and each individual component of this definition by timepoint for  
 26 each treatment group

|                      |                                                       | Weeks |      |      |      |      |      |      |      |      |      |      |      |      |
|----------------------|-------------------------------------------------------|-------|------|------|------|------|------|------|------|------|------|------|------|------|
| LLDAS Components     |                                                       | 4     | 8    | 12   | 16   | 20   | 24   | 28   | 32   | 36   | 40   | 44   | 48   | 52   |
| Anifrolumab (300 mg) | LLDAS response                                        | 0.0   | 2.5  | 6.7  | 13.6 | 18.9 | 23.1 | 25.6 | 25.0 | 27.2 | 29.2 | 29.4 | 30.8 | 30.0 |
|                      | SLEDAI-2K score $\leq 4$                              | 3.1   | 13.3 | 23.3 | 33.1 | 40.0 | 44.7 | 48.1 | 48.1 | 49.7 | 53.9 | 53.6 | 57.5 | 59.2 |
|                      | No activity in any SLEDAI-2K major organ <sup>a</sup> | 78.6  | 84.2 | 88.6 | 88.6 | 88.3 | 89.4 | 90.6 | 90.6 | 90.0 | 91.4 | 92.5 | 93.1 | 93.6 |
|                      | No fever                                              | 98.1  | 99.4 | 99.2 | 99.7 | 99.2 | 99.4 | 98.9 | 99.4 | 99.2 | 99.4 | 99.4 | 99.7 | 99.7 |
|                      | No new lupus disease activity <sup>b</sup>            | 84.2  | 86.4 | 84.7 | 80.6 | 81.7 | 81.7 | 84.2 | 83.9 | 80.3 | 81.4 | 84.7 | 85.3 | 83.6 |
|                      | PGA VAS $\leq 1$                                      | 15.0  | 32.2 | 43.3 | 51.7 | 57.2 | 61.7 | 64.2 | 63.6 | 66.4 | 66.9 | 73.6 | 73.9 | 74.4 |
|                      | GC dose $\leq 7.5$ mg/day <sup>c</sup>                | 44.2  | 45.8 | 54.2 | 60.6 | 66.9 | 72.8 | 78.1 | 80.3 | 81.9 | 82.8 | 84.2 | 83.3 | 83.9 |
|                      | No use of restricted medication <sup>d</sup>          | 97.5  | 96.1 | 95.0 | 93.6 | 92.5 | 91.7 | 91.4 | 90.6 | 88.9 | 88.3 | 87.8 | 85.0 | 81.9 |
|                      | No discontinuation of IP                              | 96.9  | 95.0 | 94.7 | 92.8 | 93.1 | 93.3 | 93.1 | 91.9 | 92.8 | 93.1 | 93.1 | 94.2 | 94.4 |

|                  |                                                       | Weeks |      |      |      |      |      |      |      |      |      |      |      |      |
|------------------|-------------------------------------------------------|-------|------|------|------|------|------|------|------|------|------|------|------|------|
| LLDAS Components |                                                       | 4     | 8    | 12   | 16   | 20   | 24   | 28   | 32   | 36   | 40   | 44   | 48   | 52   |
| Placebo          | LLDAS response                                        | 0.3   | 1.4  | 4.1  | 7.1  | 9.3  | 11.2 | 13.7 | 15.8 | 16.7 | 15.6 | 17.8 | 16.1 | 19.7 |
|                  | SLEDAI-2K score $\leq 4$                              | 2.7   | 9.8  | 18.0 | 23.2 | 27.0 | 30.6 | 35.0 | 41.3 | 42.3 | 44.3 | 48.9 | 51.1 | 55.2 |
|                  | No activity in any SLEDAI-2K major organ <sup>a</sup> | 76.2  | 77.3 | 78.7 | 80.6 | 84.2 | 85.5 | 85.0 | 85.8 | 86.1 | 86.9 | 91.0 | 91.0 | 91.0 |
|                  | No fever                                              | 96.7  | 98.9 | 98.6 | 98.6 | 98.4 | 98.6 | 98.9 | 98.6 | 99.2 | 99.5 | 99.5 | 98.9 | 98.9 |
|                  | No new lupus disease activity <sup>b</sup>            | 84.4  | 76.8 | 79.0 | 77.3 | 79.0 | 80.3 | 78.7 | 78.4 | 82.0 | 81.4 | 83.1 | 82.8 | 83.6 |
|                  | PGA VAS $\leq 1$                                      | 12.3  | 24.9 | 31.1 | 38.0 | 43.7 | 46.4 | 52.5 | 53.8 | 57.9 | 59.8 | 61.5 | 63.7 | 65.0 |
|                  | GC dose $\leq 7.5$ mg/day <sup>c</sup>                | 46.7  | 48.4 | 53.8 | 56.3 | 60.1 | 64.5 | 65.0 | 68.3 | 71.9 | 74.3 | 74.9 | 76.8 | 77.3 |
|                  | No use of restricted medication <sup>d</sup>          | 98.1  | 96.2 | 94.0 | 89.6 | 88.5 | 87.2 | 85.2 | 83.3 | 82.5 | 80.3 | 79.5 | 78.1 | 76.5 |
|                  | No discontinuation of IP                              | 96.4  | 94.8 | 93.4 | 91.8 | 90.7 | 88.8 | 89.1 | 88.3 | 88.0 | 88.5 | 89.6 | 90.7 | 92.3 |

<sup>a</sup>CNS, vascular, renal, cardiovascular and respiratory.

<sup>b</sup>No new lupus disease activity compared with the previous assessment: no present activity (item score >0) in any new SLEDAI-2K item (irrespective of organ system) compared with the previous visit.

<sup>c</sup>No prednisone equivalent dose  $\leq 7.5$  mg/day taken on any day of the period starting on the day after the previous scheduled visit and ending on the day of the visit.

<sup>d</sup>Restricted medications as defined in TULIP-2, Morand et al, 2019.

27

28 CNS, central nervous system; GC, glucocorticoid; IP, investigational product; LLDAS,

29 Lupus Low Disease Activity State; PGA, physician global assessment; SLEDAI-2K,

30 Systemic Lupus Erythematosus Disease Activity Index 2000, TULIP, Treatment of

31 Uncontrolled Lupus via the Interferon Pathway; VAS, visual analogue scale.

## 32 SUPPLEMENTARY TABLES

33 **Table S1.** Baseline patient demographics and disease characteristics in pooled TULIP data

|                                                                  | Pooled TULIP                  |                    |
|------------------------------------------------------------------|-------------------------------|--------------------|
|                                                                  | Anifrolumab 300 mg<br>(n=360) | Placebo<br>(n=366) |
| Age, mean (SD), years                                            | 42.6 (12.0)                   | 41.0 (11.9)        |
| Female, n (%)                                                    | 333 (92.5)                    | 341 (93.2)         |
| Race, <sup>a</sup> n (%)                                         |                               |                    |
| White                                                            | 235 (65.3)                    | 244 (66.7)         |
| Asian                                                            | 41 (11.4)                     | 35 (9.6)           |
| Black/African American                                           | 46 (12.8)                     | 48 (13.1)          |
| Other                                                            | 30 (8.3)                      | 31 (8.5)           |
| Time from SLE diagnosis to randomisation, median (range), months | 91.0<br>(0–555)               | 78.5<br>(4–503)    |
| IFNGS status at screening, n (%)                                 |                               |                    |
| High                                                             | 298 (82.8)                    | 302 (82.5)         |
| Low                                                              | 62 (17.2)                     | 64 (17.5)          |
| ≥1 BILAG-2004 A, n (%)                                           | 174 (48.3)                    | 179 (48.9)         |
| No BILAG-2004 A and ≥2 BILAG-2004 B, n (%)                       | 170 (47.2)                    | 162 (44.3)         |
| SLEDAI-2K global score, mean (SD)                                | 11.4 (3.8)                    | 11.5 (3.7)         |

|                                                   |            |            |
|---------------------------------------------------|------------|------------|
| <b>SLEDAI-2K <math>\geq 10</math>, n (%)</b>      | 254 (70.6) | 266 (72.7) |
| <b>PGA score, mean (SD)</b>                       | 1.8 (0.4)  | 1.8 (0.4)  |
| <b>CLASI activity score, mean (SD)</b>            | 8.4 (7.6)  | 7.8 (7.2)  |
| <b>Swollen joint count,<sup>b</sup> mean (SD)</b> | 6.8 (5.8)  | 7.2 (5.7)  |
| <b>Tender joint count,<sup>b</sup> mean (SD)</b>  | 10.3 (7.4) | 10.8 (7.5) |
| <b>SDI score, mean (SD)</b>                       | 0.6 (1.0)  | 0.6 (0.9)  |
| <b>SLE treatments at baseline, n (%)</b>          |            |            |
| <b>Glucocorticoid<sup>c</sup></b>                 | 291 (80.8) | 304 (83.1) |
| <b>Glucocorticoid <math>\geq 10</math> mg/day</b> | 190 (52.8) | 185 (50.5) |
| <b>Antimalarials</b>                              | 243 (67.5) | 267 (73.0) |
| <b>Immunosuppressants<sup>d</sup></b>             | 173 (48.1) | 177 (48.4) |

34 <sup>a</sup>Race data were missing for 16 patients in TULIP-2 (8 each in the anifrolumab and placebo groups). <sup>b</sup>Joint counts are based on 28 joints.

35 <sup>c</sup>Glucocorticoids include prednisone or equivalent. <sup>d</sup>Azathioprine, methotrexate, mycophenolate mofetil, mycophenolic acid, and mizoribine.

36

37 BILAG-2004, British Isles Lupus Assessment Group-2004; CLASI, Cutaneous Lupus Erythematosus Disease Area and Severity Index; IFNGS,

38 type I interferon gene signature; PGA, Physician's Global Assessment; SD, standard deviation; SDI, Systemic Lupus International Collaborating

39 Clinics/American College of Rheumatology Damage Index; SLE, systemic lupus erythematosus; SLEDAI-2K, SLE Disease Activity Index

40 2000; TULIP, Treatment of Uncontrolled Lupus via the Interferon Pathway.

41 **Table S2.** LLDAS response rate by timepoint and BICLA response status from Week 4 to Week 52, analysed using a stratified Cochran–  
 42 Mantel–Haenszel approach  
 43

| Timepoint | BICLA responder status at Week 52 <sup>b</sup> | Number of patients, n (%) <sup>a</sup> |                    |                      | Comparison between groups <sup>a</sup> |                   |                      |
|-----------|------------------------------------------------|----------------------------------------|--------------------|----------------------|----------------------------------------|-------------------|----------------------|
|           |                                                | LLDAS Responder                        | LLDAS Nonresponder | 95% CI response rate | Difference in response rates           | 95% CI difference | P-value <sup>c</sup> |
| Week 4    | Responder                                      | 0                                      | 318 (100)          | 0.0, 1.8             | -0.2                                   | -2.4, 2.1         | 0.8665               |
|           | Nonresponder                                   | 1 (0.2)                                | 500 (99.8)         | 0.0, 1.5             |                                        |                   |                      |
| Week 8    | Responder                                      | 10 (3.2)                               | 308 (96.8)         | 0.6, 5.7             | 1.8                                    | -1.2, 4.8         | 0.2424               |
|           | Nonresponder                                   | 7 (1.4)                                | 494 (98.6)         | 0.0, 3.0             |                                        |                   |                      |
| Week 12   | Responder                                      | 27 (8.5)                               | 291 (91.5)         | 5.2, 11.8            | 5.5                                    | 1.7, 9.3          | 0.0044               |
|           | Nonresponder                                   | 15 (3.0)                               | 486 (97.0)         | 1.1, 4.9             |                                        |                   |                      |
| Week 16   | Responder                                      | 61 (19.4)                              | 257 (80.6)         | 15.2, 23.6           | 14.6                                   | 9.8, 19.3         | <0.0001              |
|           | Nonresponder                                   | 24 (4.8)                               | 477 (95.2)         | 2.6, 7.0             |                                        |                   |                      |
| Week 20   | Responder                                      | 89 (28.1)                              | 229 (71.9)         | 23.4, 32.9           | 22.1                                   | 16.8, 27.4        | <0.0001              |

5

| Timepoint | BICLA responder status at Week 52 <sup>b</sup> | Number of patients, n (%) <sup>a</sup> |                    |                      | Comparison between groups <sup>a</sup> |                   |                      |
|-----------|------------------------------------------------|----------------------------------------|--------------------|----------------------|----------------------------------------|-------------------|----------------------|
|           |                                                | LLDAS Responder                        | LLDAS Nonresponder | 95% CI response rate | Difference in response rates           | 95% CI difference | P-value <sup>c</sup> |
|           | <b>Nonresponder</b>                            | 30 (6.1)                               | 471 (93.9)         | 3.7, 8.4             |                                        |                   |                      |
| Week 24   | <b>Responder</b>                               | 109 (34.5)                             | 209 (65.5)         | 29.4, 39.5           | 28.4                                   | 22.8, 34.0        | <0.0001              |
|           | <b>Nonresponder</b>                            | 31 (6.1)                               | 470 (93.9)         | 3.7, 8.4             |                                        |                   |                      |
| Week 28   | <b>Responder</b>                               | 117 (36.8)                             | 201 (63.2)         | 31.7, 41.8           | 28.4                                   | 22.7, 34.2        | <0.0001              |
|           | <b>Nonresponder</b>                            | 42 (8.3)                               | 459 (91.7)         | 5.7, 10.9            |                                        |                   |                      |
| Week 32   | <b>Responder</b>                               | 125 (39.2)                             | 193 (60.8)         | 34.0, 44.4           | 31.8                                   | 26.0, 37.6        | <0.0001              |
|           | <b>Nonresponder</b>                            | 37 (7.4)                               | 464 (92.6)         | 4.9, 9.9             |                                        |                   |                      |
| Week 36   | <b>Responder</b>                               | 139 (43.6)                             | 179 (56.4)         | 38.3, 49.0           | 36.1                                   | 30.2, 42.0        | <0.0001              |
|           | <b>Nonresponder</b>                            | 38 (7.5)                               | 463 (92.5)         | 5.0, 10.0            |                                        |                   |                      |
| Week 40   | <b>Responder</b>                               | 150 (47.2)                             | 168 (52.8)         | 41.8, 52.6           | 41.2                                   | 35.3, 47.1        | <0.0001              |
|           | <b>Nonresponder</b>                            | 30 (6.0)                               | 471 (94.0)         | 3.7, 8.4             |                                        |                   |                      |
| Week 44   | <b>Responder</b>                               | 153 (47.9)                             | 165 (52.1)         | 42.6, 53.3           | 40.8                                   | 34.8, 46.7        | <0.0001              |

| Timepoint | BICLA responder status at Week 52 <sup>b</sup> | Number of patients, n (%) <sup>a</sup> |                    |                      | Comparison between groups <sup>a</sup> |                   |                              |
|-----------|------------------------------------------------|----------------------------------------|--------------------|----------------------|----------------------------------------|-------------------|------------------------------|
|           |                                                | LLDAS Responder                        | LLDAS Nonresponder | 95% CI response rate | Difference in response rates           | 95% CI difference | <i>P</i> -value <sup>c</sup> |
|           | <b>Nonresponder</b>                            | 36 (7.2)                               | 465 (92.8)         | 4.7, 9.7             |                                        |                   |                              |
| Week 48   | <b>Responder</b>                               | 168 (52.9)                             | 150 (47.1)         | 47.5, 58.3           | 48.3                                   | 42.4, 54.1        | <0.0001                      |
|           | <b>Nonresponder</b>                            | 23 (4.6)                               | 478 (95.4)         | 2.4, 6.7             |                                        |                   |                              |
| Week 52   | <b>Responder</b>                               | 186 (58.4)                             | 132 (41.6)         | 53.1, 63.7           | 54.7                                   | 49.0, 60.3        | <0.0001                      |
|           | <b>Nonresponder</b>                            | 19 (3.8)                               | 482 (96.2)         | 1.7, 5.8             |                                        |                   |                              |

44

45 <sup>a</sup>Responder rates were calculated using a stratified Cochran–Mantel–Haenszel approach, with stratification factors of SLEDAI-2K at screening,  
 46 Day 1 glucocorticoid dose, type I IFN gene signature at screening, and study. Nominal *P*-values were calculated using logistic regression with  
 47 the same stratification factors. <sup>b</sup>The number of patients analysed at each timepoint was the same; n=318 responders and n=501 nonresponders.

48 <sup>c</sup>Unadjusted *P*-values are presented.

49 BICLA, British Isles Lupus Assessment Group–based Composite Lupus Assessment; CI, confidence interval; IFN, interferon; LLDAS, Lupus  
 50 Low Disease Activity State; SLEDAI-2K, Systemic Lupus Erythematosus Disease Activity Index 2000.

7

51 **Table S3. LLDAS response rate by timepoint and SRI(4) response status from Week 4 to week 52, analysed using a stratified Cochran–**  
 52 **Mantel–Haenszel approach**

| Timepoint | SRI(4) responder status at Week 52 <sup>b</sup> | Number of patients, n (%) <sup>a</sup> |                    |                      | Comparison between groups <sup>a</sup> |                   |                      |
|-----------|-------------------------------------------------|----------------------------------------|--------------------|----------------------|----------------------------------------|-------------------|----------------------|
|           |                                                 | LLDAS Responder                        | LLDAS Nonresponder | 95% CI response rate | Difference in response rates           | 95% CI difference | P-value <sup>c</sup> |
| Week 4    | Responder                                       | 0                                      | 380 (100)          | 0.0, 1.6             | −0.2                                   | −2.4, 1.9         | 0.8231               |
|           | Nonresponder                                    | 1 (0.2)                                | 438 (99.8)         | 0.0, 1.7             |                                        |                   |                      |
| Week 8    | Responder                                       | 10 (2.7)                               | 370 (97.3)         | 0.5, 4.9             | 1.1                                    | −1.7, 3.9         | 0.4448               |
|           | Nonresponder                                    | 7 (1.6)                                | 432 (98.4)         | 0.0, 3.3             |                                        |                   |                      |
| Week 12   | Responder                                       | 30 (8.1)                               | 350 (91.9)         | 5.1, 11.1            | 5.3                                    | 1.8, 8.9          | 0.0035               |
|           | Nonresponder                                    | 12 (2.7)                               | 427 (97.3)         | 0.8, 4.7             |                                        |                   |                      |
| Week 16   | Responder                                       | 66 (17.5)                              | 314 (82.5)         | 13.8, 21.3           | 13.3                                   | 8.9, 17.6         | <0.0001              |
|           | Nonresponder                                    | 19 (4.3)                               | 420 (95.7)         | 2.0, 6.5             |                                        |                   |                      |
| Week 20   | Responder                                       | 99 (26.4)                              | 281 (73.6)         | 22.1, 30.7           | 22.0                                   | 17.2, 26.8        | <0.0001              |
|           | Nonresponder                                    | 20 (4.4)                               | 419 (95.6)         | 2.2, 6.6             |                                        |                   |                      |



| Timepoint | SRI(4) responder status at Week 52 <sup>b</sup> | Number of patients, n (%) <sup>a</sup> |                    |                      | Comparison between groups <sup>a</sup> |                   |                      |
|-----------|-------------------------------------------------|----------------------------------------|--------------------|----------------------|----------------------------------------|-------------------|----------------------|
|           |                                                 | LLDAS Responder                        | LLDAS Nonresponder | 95% CI response rate | Difference in response rates           | 95% CI difference | P-value <sup>c</sup> |
| Week 24   | Responder                                       | 118 (31.2)                             | 262 (68.8)         | 26.6, 35.8           | 26.4                                   | 21.2, 31.5        | <0.0001              |
|           | Nonresponder                                    | 22 (4.9)                               | 417 (95.1)         | 2.6, 7.1             |                                        |                   |                      |
| Week 28   | Responder                                       | 127 (33.9)                             | 253 (66.1)         | 29.3, 38.5           | 26.7                                   | 21.4, 32.0        | <0.0001              |
|           | Nonresponder                                    | 32 (7.2)                               | 407 (92.8)         | 4.5, 9.8             |                                        |                   |                      |
| Week 32   | Responder                                       | 134 (35.6)                             | 246 (64.4)         | 30.9, 40.3           | 29.4                                   | 24.1, 34.7        | <0.0001              |
|           | Nonresponder                                    | 28 (6.2)                               | 411 (93.8)         | 3.7, 8.7             |                                        |                   |                      |
| Week 36   | Responder                                       | 153 (40.7)                             | 227 (59.3)         | 35.9, 45.6           | 35.5                                   | 30.1, 40.8        | <0.0001              |
|           | Nonresponder                                    | 24 (5.3)                               | 415 (94.7)         | 2.9, 7.6             |                                        |                   |                      |
| Week 40   | Responder                                       | 165 (43.9)                             | 215 (56.1)         | 39.0, 48.8           | 40.5                                   | 35.3, 45.8        | <0.0001              |
|           | Nonresponder                                    | 15 (3.3)                               | 424 (96.7)         | 1.3, 5.4             |                                        |                   |                      |
| Week 44   | Responder                                       | 174 (46.4)                             | 206 (53.6)         | 41.6, 51.2           | 43.1                                   | 37.8, 48.3        | <0.0001              |
|           | Nonresponder                                    | 15 (3.3)                               | 424 (96.7)         | 1.3, 5.4             |                                        |                   |                      |

| Timepoint | SRI(4) responder status at Week 52 <sup>b</sup> | Number of patients, n (%) <sup>a</sup> |                    |                      | Comparison between groups <sup>a</sup> |                   |                              |
|-----------|-------------------------------------------------|----------------------------------------|--------------------|----------------------|----------------------------------------|-------------------|------------------------------|
|           |                                                 | LLDAS Responder                        | LLDAS Nonresponder | 95% CI response rate | Difference in response rates           | 95% CI difference | <i>P</i> -value <sup>c</sup> |
| Week 48   | Responder                                       | 184 (48.9)                             | 196 (51.1)         | 43.9, 53.8           | 47.3                                   | 42.0, 52.5        | <0.0001                      |
|           | Nonresponder                                    | 7 (1.6)                                | 432 (98.4)         | 0.0, 3.3             |                                        |                   |                              |
| Week 52   | Responder                                       | 203 (54.0)                             | 177 (46.0)         | 49.1, 58.8           | 53.5                                   | 48.4, 58.6        | <0.0001                      |
|           | Nonresponder                                    | 2 (0.5)                                | 437 (99.5)         | 0.0, 1.9             |                                        |                   |                              |

53

54 <sup>a</sup>Responder rates were calculated using a stratified Cochran–Mantel–Haenszel approach, with stratification factors of SLEDAI-2K at screening,55 Day 1 glucocorticoid dose, type I IFN gene signature at screening, and study. Nominal *P*-values were calculated using logistic regression with56 the same stratification factors. <sup>b</sup>The number of patients analysed at each timepoint was the same; n=380 responders and n=439 nonresponders.57 <sup>c</sup>Unadjusted *P*-values are presented.

58 CI, confidence interval; IFN, interferon; LLDAS, Lupus Low Disease Activity State; SLEDAI-2K, Systemic Lupus Erythematosus Disease

59 Activity Index 2000; SRI(4), SLE Responder Index-4; SLE, systemic lupus erythematosus.

60

10

61 **Table S4.** LupusQoL responses (change from baseline) by LLDAS attainment at Week 52,  
 62 analysed using summary statistics

| <b>LupusQoL change from baseline to Week 52 by domain, median (IQR)</b> | <b>LLDAS responder (n=205)</b> | <b>LLDAS nonresponder (n=614)</b> |
|-------------------------------------------------------------------------|--------------------------------|-----------------------------------|
| <b>Physical health</b>                                                  | 9.38 (0, 25.00)                | 3.13 (−3.13, 18.75)               |
| <b>Pain</b>                                                             | 8.34 (0, 33.33)                | 8.33 (0, 25.00)                   |
| <b>Planning</b>                                                         | 8.33 (0, 33.33)                | 0 (−8.33, 16.67)                  |
| <b>Intimate relationships</b>                                           | 0 (0, 25.00)                   | 0 (0, 12.50)                      |
| <b>Burden to others</b>                                                 | 8.33 (0, 33.33)                | 0 (−8.33, 25.00)                  |
| <b>Emotional health</b>                                                 | 4.17 (0, 16.67)                | 4.16 (−4.17, 16.66)               |
| <b>Body image</b>                                                       | 7.50 (0, 25.00)                | 5.00 (−5.00, 20.83)               |
| <b>Fatigue</b>                                                          | 12.50 (0, 31.25)               | 6.25 (−6.25, 18.75)               |

63

64 IQR, interquartile range; LLDAS, Lupus Low Disease Activity State; LupusQoL, Lupus

65 Quality of Life.
